# Comparative genomics groups phages of Negativicutes and classical Firmicutes despite different Gram-staining properties

Authors:

5 Chris M Rands<sup>1\*</sup>, Harald Brüssow<sup>2</sup>, Evgeny M Zdobnov<sup>1\*</sup>

Correspondence:

\* Christopher.Rands@unige.ch, Evgeny.Zdobnov@unige.ch

10 Affiliations:

<sup>1</sup> Department of Genetic Medicine and Development, University of Geneva Medical School and Swiss Institute of Bioinformatics, Geneva, Switzerland

<sup>2</sup> KU Leuven, Department of Biosystems, Laboratory of Gene Technology, Leuven, Belgium

15

## Summary

Negativicutes are Gram-Negative bacteria characterized by two cell membranes, but they are phylogenetically a side-branch of Gram-Positive Firmicutes that contain only a single membrane. We asked whether viruses (phages) infecting Negativicutes were horizontally acquired from Gram-Negative Proteobacteria, given the shared outer cell structure of their bacterial hosts, or if Negativicute phages co-evolved vertically with their hosts and thus resemble Gram-Positive Firmicute prophages. We predicted and characterised 485 prophages from Gram-Negative Firmicute genomes plus 2,977 prophages from other bacterial clades, and we used virome sequence data from 183 human stool samples to provide independent evidence for our predictions. The majority of the identified Negativicute prophages were lambdoids closer related to prophages from other Firmicutes than Proteobacteria by sequence relationship and genome organization (position of the lysis module). Only a single Mu-like candidate prophage and no clear P2-like prophages were identified in Negativicutes, both commonly found in Proteobacteria. Therefore, it is unlikely that Negativicute phages were acquired from Proteobacteria. Sequence-related prophages were identified in two distinct Negativicute orders (Veillonellales and Acidaminococcales) possibly suggesting horizontal cross-order phage infection between human gut commensals. Phages infecting these Negativicute orders occasionally harboured putative antibiotic resistance genes.

## Introduction

The number of bacterial and archaeal species, or so-called operational taxonomic units, has been estimated at between 0.7 and 4.3 million using 16S rRNA sequences  
40 (Louca et al., 2019). Despite frequent horizontal gene transfer, phylogenetic trees can still be developed for bacteria, allowing sequence-based taxonomic classification. Bacterial virus or bacteriophage (phage) species might outnumber bacterial species since most investigated phages are host-specific and most bacterial species are infected by several distinct phages. The high percentage of unknown genes identified  
45 in metavirome analyses supports the notion that phages are very diverse (Yutin et al., 2018). Although rampant horizontal gene transfer between phages was predicted by the modular theory of phage evolution (Botstein, 1980), comparative genomics has revealed aspects of vertical evolution in bacteriophages and ancient lineages. Phages of a given type share substantial sequence homology when infecting the same  
50 bacterial species or genera, but for increasingly distant bacterial hosts, the ability to identify homology gradually decreases until the phage sequences can no longer be aligned. However, conservation of aspects of phage genome organization (i.e. gene order) was observed between phages infecting distantly related hosts, for example across lambdoid phages from Proteobacteria, Firmicutes and viruses infecting  
55 Archaea (Lucchini et al., 1998; Pfister et al., 1998; Desiere et al., 1999; Lucchini et al., 1999; Desiere et al., 2000; Brüssow and Desiere, 2001; Casjens and Hendrix, 2015; Kang et al., 2017; Mahmoudabadi and Phillips, 2018). Structural biologists even detected relatedness between the protein folds of capsid components from phages and animal viruses (Bamford et al., 2005). These observations indicate that phage

60 lineages have a very ancient shared ancestry and diversified in parallel with their host  
bacteria through co-evolution.

In general, bacterial lineages accumulate small phenotypic (i.e. trait) changes, making  
close bacteria-phage co-evolution feasible. However, occasionally large bacterial  
65 phenotypic changes occur (Cavalier-Smith, 2006), potentially presenting a challenge  
for their phages to adapt. One such example comes from the Negativicutes. Bacterial  
genome sequence analysis places Negativicutes (prototype *Veillonella parvula*) within  
the Firmicutes (Marchandin et al., 2010; Campbell et al., 2015), a clade of almost  
exclusively Gram-Positive bacteria (prototype *Bacillus subtilis*) with a single  
70 membrane and a thick peptidoglycan layer. However, Negativicutes are clearly Gram-  
Negative bacteria since they possess an inner cell membrane, a thin peptidoglycan  
layer and an outer membrane with lipopolysaccharides. In this respect Negativicutes  
resemble Gram-Negative Proteobacteria (prototype *Escherichia coli*). Therefore,  
during evolutionary history Firmicute phages had to adapt to a different membrane  
75 boundary, assuming vertical phage-bacteria co-evolution. An alternative is that  
Negativicute phages were acquired horizontally from Proteobacteria, plausible given  
the shared outer cell structure of their bacterial hosts, and possible environmentally  
since both bacterial groups share an ecological niche in human microbiomes,  
particularly in the human gut (Rands et al., 2018).

80

We used the unusual relationship between Negativicutes and classical Gram-Positive  
Firmicutes to investigate phage-bacteria co-evolution. Apart from the Negativicutes,  
the only other Gram-Negative Firmicute group are the Halanaerobiales, a very poorly  
sampled bacterial order whose members inhabit saline environments like lakes.

85 Phylogenetically Negativicutes are closest to Gram-Positive Clostridiales, while  
Halanaerobiales are closest to Gram-Positive Natranaerobiales, so the two Gram-  
Negative clades form independent branches of Firmicutes (Antunes et al., 2016). If  
phages co-evolved in parallel with their bacterial hosts, we would expect Negativicute  
and Halanaerobiales phages to be closer to phages from Gram-Positive Firmicutes  
90 that those of Proteobacteria. Conversely, we might find Negativicute phages are  
grouped with phages from Proteobacteria, “attracted” by the similar cell surface  
structure, since lipopolysaccharides and outer membrane proteins are the primary  
point of contact for phages in the infection process. These hypotheses have not been  
tested since sequence data on phages from Gram-Negative Firmicutes is currently  
95 limited to a few incomplete Negativicute phage sequences reconstituted from human  
and mouse virome projects (Pride et al., 2012; Kim and Bae, 2016), some predicted  
but uncharacterised prophages (Roux et al., 2015), and two possibly defective  
lambdoid prophages (Rands et al., 2018).

100 Here we predicted and characterised 485 prophages from Gram-Negative Firmicute  
genomes and compared them to 2,977 prophages that we predicted in other bacterial  
lineages. We found that both the genome organization and sequence-relatedness of  
lambdoid Negativicute and Halanaerobiales prophages identified them as closer  
relatives of lambdoid phages from Gram-Positive Firmicutes than prophages from  
105 Proteobacteria. Phages frequently found in Proteobacteria, like Mu-like and P2-like  
prophages, were only very rarely or not at all detected in Negativicutes. These  
observations are not expected under a hypothesis of substantial phage gene flow  
between Proteobacteria and Gram-Negative Firmicutes.

## Results and Discussion

### 110 Bacterial genome screening identifies prophages from Gram- Negative Firmicutes

As a first step towards an evolutionary analysis of Gram-Negative Firmicute phages, we screened all available Negativicute and Halanaerobiales bacterial genomes deposited in the NCBI Genbank database for sequences of prophages. Using  
115 PHASTER (Arndt et al., 2016) with additional post-processing and annotation steps (see Methods and materials) we predicted and annotated 485 prophages across 350 Gram-Negative Firmicute bacterial genome assemblies. For comparison, we also predicted prophages in 200 complete bacterial genomes from each of *Escherichia* and *Bacillus*, and 136 complete genomes (the total available) from *Clostridium*.

120

Among Gram-Negative Firmicute phages, 41% of the predicted prophages were from the Negativicute order Selenomonadales (genera *Selenomonas* and *Sporomusa*), 39% were from the Negativicute order Veillonellales (genera *Veillonella* and *Megasphaera*), 8% from the Negativicute order Acidaminococcales (genera  
125 *Acidaminococcus* and *Phascolarctobacterium*), and 7% from various other Negativicute taxa. Five per cent of prophage sequences came from the order Halanaerobiales (genus *Halanaerobium*) (**Figure S1, Table S1**). For genera represented with more than 8 sequenced bacterial genomes, the highest viral frequency was 4.1 prophages per bacterial genome, found in *Sporomusa*, while the  
130 lowest frequency of 0.3 prophages per bacterial genome was detected in *Halanaerobium*. Overall, a mean of 1.5 prophages per sequenced Negativicute bacterial genome was detected. This figure was only slightly higher, namely 1.9, when

calculated for completely sequenced and assembled Negativicute genomes. A typical bacterial genome contains around 3 prophages based on *in silico* prediction (Kang et al., 2017), similar to our estimate of 3-4 prophages per genome for *Clostridium* and *Bacillus* (**Table S2**), while higher values are normal for Gram-Negative *Enterobacteriaceae* (Bobay et al., 2014), indeed, we estimate 8.8 prophages per *Escherichia* genome. However, the low prophage content in Negativicutes and particularly in Halanaerobiales should be interpreted with caution: prophages might be missed since sequenced phages from Gram-Negative Firmicutes are very few and protein annotations are lacking, making prophage detection more difficult computationally. Prophage proteins lacking any sequence homology to previously known phage proteins will likely escape detection.

## 145 Virome screening for Negativicute phages confirms prophage predictions

To circumvent this difficulty of a deficit of annotated phage proteins, we used viral-like particle (VLP) (“virome”) data to confirm that we did not miss obvious prophage predictions. We screened 183 samples of virome sequences from human stool for matches to four completely sequenced strains of Negativicute that are residents of the human gut. The strains were: *Acidaminococcus intestini* RYC-MR95, *Veillonella parvula* UTDB1-3, *Dialister Marseille*-P5638, and *Negativicoccus massiliensis* Marseille-P2082, all predicted to contain at least one prophage (**Table S3**). We processed and aligned the virome reads to these bacterial genome sequences (see Materials and Methods). If the VLP sequences contain no temperate phages infecting these bacteria, we will find only few virome reads aligning with the bacterial genome, likely representing bacterial DNA contaminating the viral fraction or bacterial DNA

packaged into the phage capsid by generalized transduction. If the virome read alignments overlap the predicted prophage sequences, the prediction is independently confirmed. It is, however, also possible that a predicted prophage lacks a virome counterpart, which suggests a prophage remnant that is not any longer active in producing an extracellular phage or a phage simply not present in the examined sample. The virome sequences confirmed the previously described prophages 1 and 2 in *A. intestini* (Rands et al., 2018) and prophage 4 we predicted here (**Figure S2A**). The identified further sharp peak in read depth at around 700kb, likely represents an erroneously packaged element like a small integrative plasmid or conjugative transposon (**Table S4**), similar to a previously reported element (Warburton et al., 2009).

For *V. parvula* the two predicted prophages were confirmed (**Figure S2B**), and two further peaks represent bacterial DNA (**Table S4**). For *Dialister*, few reads match the predicted prophage and another small peak covers one kb of unannotated DNA (**Table S4, Figure S3A**). For *Negativicoccus*, five genome regions showed weak matches with virome sequences (**Figure S3B**), only one corresponds to a predicted prophage. Two larger peaks correspond to an Illumina PCR Primer and bacterial DNA (**Table S4**). Overall, none of the read alignment peaks not overlapping a prophage prediction appear to correspond to real phages. Therefore, while homology-based computational prediction of prophages from bacterial genome sequences may underestimate the true prophage content by missing highly divergent phages, the read alignment of virome data to bacterial chromosomes does not suggest that we missed clear prophages in these four test cases.



## A common genome organization among prophages from Negativicutes and Gram-Positive Firmicutes

185 Next, we analysed the genome organization of the predicted Gram-Negativicute Firmicute prophages. We annotated the prophage genes and color-coded them according to their putative function and constructed prophage genome maps. Alignment of the genome maps showed a common pattern of genome organization for the best annotated prophage predictions from Negativicutes. Over the DNA  
190 packaging, head and head to tail genes, the gene organization was strikingly conserved and shared a similar gene order with lambdoid prophages from both Firmicutes and Proteobacteria (**Figure 1**). Halanaerobiales prophages also showed the typical genome map of lambdoid prophages, although few complete prophages were predicted, due to the paucity of available bacterial genomes. We conducted a gene  
195 flanking analysis with the entire predicted prophage set by asking what annotated genes are found adjacent to the query gene. We found that integrase genes were most frequently flanked by phage lysogeny genes (e.g. phage repressors) on one side and bacterial genes on the other side. DNA replication genes (primases and helicases) were flanked by lysogeny and DNA packaging genes (terminases), respectively. The  
200 phage terminase gene had frequently another terminase gene on one side and a portal protein gene on the other side. The prohead protease or scaffold genes were bracketed by portal and head genes. Head-to-tail genes were found next to head genes on one side and tail genes on the other side. Tail sheath genes were flanked by head-to-tail and tail genes. Tail, tail tube, and tail tape measure genes showed  
205 mostly other tail genes next to them. Notably, tail fibre genes were next to other tail genes on one side and holin or lysin or lysogeny genes at the other side (**Figure 1**).

This order across the morphogenesis genes mirrors that of typical lambda-like prophages from Firmicutes (Lucchini et al., 1999). However, the phage lysis module  
210 (holin, lysin genes) has a different genome position in lambdoid prophages from Proteobacteria (**Figure 1A**). In Firmicute lambdoid phages the lysis cassette follows directly the tail genes and precedes the lysogeny module as observed for *Streptococcus* Sfi21dt1/Sfi11-like phages (Canchaya et al., 2003b). However, in lambdoid prophages from Proteobacteria the lysis module is located after the phage  
215 DNA replication module and precedes the DNA packaging (terminase) genes like the classical Lambda phage. This distinct positioning of the lysis module in phages from Firmicutes and Proteobacteria is apparently a general rule. There are no exceptions looking at the best annotated prophage genome maps (**Figure 1A**), and the same trend is observed when considering all prophages (**Figure S4**). Rare exceptions to the  
220 rule may be due to mis-annotations, prophage remnants, recombination events or non-lambdoid prophages and none of the few candidate Negativicute phage exceptions represented convincing examples of intact lambdoid phages upon further inspection of the genome maps and protein annotations. We are aware of only a single exception from isolated sequenced phages, *Pseudomonas* phage D3 infecting a  
225 Proteobacterium displays the Firmicute prophage-specific lysis gene constellation (Kropinski, 2000). It is unlikely that this different lysis cassette positioning reflects distinct transcriptional regulation of the phage lysis program necessitated by the presence of two vs. one host membranes that must be crossed during progeny phage release, since the prophages from Negativicutes egress from bacteria enclosed by two  
230 membranes while maintaining the lysis module position of Firmicutes. The positioning of the lysis cassette might just represent a conserved trait inherited from ancestor phages, but it remains a useful evolutionary marker for phylogenetic studies.

Negativicute phages are thus linked by their prophage genome maps with classical Gram-Positive Firmicute phages, inconsistent with widespread acquisition of Negativicute phages from Proteobacteria and instead supporting the vertical co-  
235 evolution model. In this evolutionary scheme one would also expect few Mu-, P2- or Inovirus-like prophages in Negativicutes, which are commonly found in Proteobacteria. We found only a single Negativicute prophage that displayed similarity to a Mu-like prophage genome map (~50kb size with a characteristic gene order: two transposition  
240 genes, transcriptional activator, lysis, head and tail genes comprising baseplate genes, followed by a reverse transcriptase genes) (**Figure S5**). However, this observation is not without precedence since similar Mu-like prophages were occasionally found in Gram-Positive Firmicutes (Toussaint, 2013). We did not detect clearly P2-like prophages in Negativicutes. However, this negative result must be  
245 interpreted with caution since we will miss prophages that lack homology to known phage annotated proteins and are absent from virome sequences. Our methods are not designed to detect Inoviruses, but a recent study did not find evidence of these in Negativicutes, although they sampled relatively few Negativicute genomes, and unexpectedly they did report possible Inovirus-like prophages in Gram-Positive  
250 Firmicutes (Roux et al., 2019).

## Sequence relatedness of the Negativicute phages identifies evolutionary relationships among prophages

In the next step we identified homologous taxonomic groups of phages based on  
255 sequence information (see Materials and Methods). Across the full prophage genome sequences, the phages of Gram-Negative Firmicutes, Gram-Positive Firmicutes, and

Proteobacteria always formed separate groups. This is indicated in **Figure 2A,B** where individual phages are depicted as dots coloured by their bacterial host with each grid reference showing a different cluster of phages. The clusters with large number  
260 of phages appear as blocks of homogenous colour so the individual dots are not visible. At the 80% nucleotide sequence identity connections were, with one exception, limited to prophages infecting the same taxonomic order. The exception was high nucleotide sequence sharing between a prophage pair retrieved from Veillonellales and Acidaminococcales (**Figure 2B**, grid reference A1), two different orders of  
265 Negativicutes. When the threshold was decreased to 40% nucleotide sequence identity over the prophage genome, this number increased to four pairs of related Veillonellales and Acidaminococcales phages (**Figure 2A**, grid reference G3). In fact, when Veillonallales and Acidaminococcales prophages were classified according to sequence relationship within this cluster, no correlation with the bacterial host order  
270 was observed suggesting frequent phage exchanges between these two Negativicute groups (**Figure 3**). The high nucleotide sequence identity between prophages from two different orders of bacteria is unusual. This close relationship between Veillonellales and Acidaminococcales prophages might not necessarily reflect close evolutionary relationships of the bacterial hosts but could instead be the result from  
275 cross-order phage infection. With laboratory-adapted phages, infections across genus borders are rare and sequence homology analyses generally support this (Gao et al., 2017), but microbial ecologists have recently provided data suggesting that phage infections across larger taxonomic borders occur in the natural environment at much higher frequency than anticipated from laboratory experiments (Kauffman et al., 2018).

280

Neither Veillonellales nor Acidaminococcales prophages shared nucleotide homology with Selenomonadales prophages (**Figure 2A,B**), the other large order of Negativicutes. The position of Selenomonadales is not certain in bacterial phylogenetic analysis, some authors put them closer to Veillonellales (Antunes et al., 285 2016), others place them closer to Acidaminococcales (Campbell et al., 2015), while others left the phylogenetic relationship of the Negativicute orders unresolved (Vesth et al., 2013; Yutin and Galperin, 2013). Prophage sequence relationships suggest a closer relationship between Veillonellales and Acidaminococcales to the exclusion of Selenomonadales. However, it is unclear whether prophage sequences can be used 290 as markers for resolving phylogenetic relationships of their host bacteria.

When restricting the analysis to a single relatively conserved protein, the portal protein, we observe that prophages of Negativicutes shared 40% amino acid sequence identity with Halanaerobiales and Firmicute prophages, but not with portal proteins from 295 prophages of Proteobacteria (**Figure 2C**, e.g. grid references A4, E1, E2, E3, F6, G1, G4, I6, I8, J4, J5 and L5) with only a single exception (grid reference C6, which contains just one *E. coli* phage portal protein with portal proteins of Gram-Positive and Gram-Negative Firmicute prophages). This pattern of sequence conservation concurs with the genome map analysis in identifying the closer evolutionary relationship 300 between Negativicute and classical Firmicute prophages to the exclusion of Proteobacteria prophages. Negativicute prophages are thus clearly not derived from Proteobacteria prophages, so prophage analysis thus suggests that the phage and bacterial phylogenies are concordant, despite the different Gram-staining properties of the bacterial host, and consistent with a model of vertical phage-bacteria co- 305 evolution.

## Negativicute prophages occasionally harbour antibiotic resistance genes

It is disturbing that a prophage from *Acidaminococcus* that is related to other  
310 prophages in different bacterial orders (**Figure 3**) was shown to be associated, in a  
transposon context, with an antibiotic resistance namely the *aci1* gene encoding a  
class A beta-lactamase (Rands et al., 2018), which confers resistance to penicillins  
and extended-spectrum cephalosporins (Galán et al., 2000). Here we also found that  
three different *Veillonella* species carried genes annotated as metallo beta-lactamase  
315 (MBL) genes in a prophage map context. The genome maps are conserved and across  
the full prophage sequences the mean pairwise sequence identity is 49%. However,  
the prophage context is not clear since there is no DNA replication module and there  
are several putative plasmid annotated proteins (**Figure S6**). Additionally, while MBLs  
are known to provide resistance to carbapenems, they have also diverse other  
320 functions as hydrolytic enzymes. Until the antibiotic resistance function is biologically  
demonstrated for these *Veillonella* prophage genes, its possible resistance function  
should be interpreted with caution. Notably, one *Selenomonas* prophage element  
contained a better characterised antibiotic resistance gene, tetracycline resistance  
gene *tet(32)*, related to one found in a *Clostridium* species (Melville 2001). This ARG  
325 is in a clear prophage remnant that has suffered substantial rearrangement, but the  
flanking integrases could still confer mobility to the *tet(32)* gene (**Figure S6**). The  
*tet(32)* gene was found in a small integrative plasmid or conjugative transposon  
context from the virome data (**Table S4**).

Our results are of public health interest given the current antibiotic resistance crisis  
330 since Negativicutes are common human gut commensals, potentially providing a  
reservoir of ARGs that might spread to pathogens. Transposons, plasmids and phages  
are all mobile elements that can facilitate the lateral transfer of ARGs among bacteria,  
but it remains controversial how frequently phages encode ARGs (Enault et al., 2017).  
Previous analyses identified a transposon-associated ARG, *aci1*, in an  
335 *Acidaminococcus* prophage (Rands et al., 2018). Here we revealed another putative  
ARG, MBL, in a possible context of a *Veillonella* prophage and another probable ARG,  
*tet(32)*, in a rearranged *Selenomonas* prophage remnant. So, unambiguous cases of  
Negativicute prophages encoding and likely mobilising ARGs are apparently  
uncommon.

340

## Comparison of prophages and extracellular Negativicute phages

In two faecal samples from human subjects with inflammatory bowel diseases the  
phage sequence abundance was high enough to generate an assembly of two free  
extracellular Negativicute phages from the virome sequences. One prophage -  
345 extracellular phage pair from *Veillonella parvula*, whose head and lysis gene  
constellation attributed them to the Sfi11like (Brussowvirus) lineage of lambdoid  
Firmicute phages, shared highly related DNA replication and transcriptional regulation  
modules (**Figure 4A**). Sequence relatedness dropped substantially over the lysis and  
lysogeny module and the tail fiber region and returned to moderately elevated levels  
350 over the remainder of the virion structural genes. This type of modular phage genome  
organization mirrors closely that observed in streptococcal phages from Firmicutes  
(Canchaya et al., 2003b). Another prophage - extracellular phage pair from *V. parvula*,  
whose characteristic portal-Clp protease-major head gene constellation attributes

355 them to the Sfi21dt1virus (Moineauvirus) lineage of lambdoid Firmicute phages, shared high sequence identity over the virion structural genes, but the non-structural genes are absent, implying a prophage remnant unable to induce (**Figure 4B**).

## Chromosomal location of Negativicute prophages in bacterial genomes is not random

360 Prophage integration has a profound impact on bacterial chromosome structure and bacterial evolution (Canchaya et al., 2003b; Brüssow et al., 2004; Bobay et al., 2013). Complete Negativicute sequences assembled into a circular bacterial genome allow the localization of the prophage insertion sites with respect to the bacterial origin and terminus of replication. These bacterial genomes replicate bidirectionally and the  
365 regions near the origin generally have highly transcribed genes due to gene dosage effects. Since prophages are transcriptionally mostly silent and should not interfere with the expression of bacterial household genes, it was postulated that prophages should preferentially be inserted away from the origin of replication (Canchaya et al., 2004; Bobay et al., 2013; Oliveira et al., 2017). Indeed, dividing up Negativicute  
370 genomes into twenty equally sized windows, with each window representing 5% of the chromosome length, we found that Negativicute prophages were not distributed randomly across bacterial genomes ( $p < 0.01$ ,  $\chi^2$  test), with a trend towards insertion towards the terminus of replication (**Figure 5**).

375



## Trends in Negativicute prophage decay

The mean prophage genome size of 24kb across Negativicute and Halanaerobiales prophages is too small for complete lambdoid Firmicute prophages. In fact, only about  
380 10% of the prophages showed a genome length larger than 40kb, the standard genome size of lambdoid prophages. Even among complete finished Negativicute genome assemblies the mean prophage genome size is only 27kb, implying that fragmented prophage predictions are not the main reason for this observation. An alternative explanation is that prophages degrade by gene deletion to become  
385 prophage remnants (Bobay et al., 2014). It has been argued that the decay of prophage genomes may not be random. Genes encoding lysogenic conversion functions, transcriptional regulators or recombinases mostly located in the lysogeny module, could be of selective value to the bacterial fitness resulting in their preferential maintenance in prophage remnants (Canchaya et al., 2002; Canchaya et al., 2003a;  
390 Bobay et al., 2014). However, for Negativicutes, we did not find a clear correlation between prophage genome size and the functional modules preserved, so these prophages appear to decay with comparable probability across the prophage genomes as they become remnants, although the trend is noisy (**Figure S7**). One might speculate that for the currently sequenced Negativicutes, fitness factors are not  
395 frequently mobilized by the phage integrase. Indeed, although we found a few phage encoded ARGs discussed above, there were no clear examples of Negativicute prophages encoding bacterial virulence factors based a scan of the VirulenceFinder database (see Materials and Methods), which contrasts with known examples in pathogenic Firmicutes and Proteobacteria (Brüssow et al., 2004).

400

## Conclusions

Our study demonstrates that bacterial genome sequences combined with virome sequence data are valuable resources for comparative phage genomics, provided that  
405 bacterial genomes and viromes are derived from the same ecological context. We provide insights into the co-evolution of Gram-Negativicute phages and their bacterial hosts. We found evidence of possible cross-order infection between Veillonellales and Acidaminococcales phages, both common human gut commensals, which might also indicate that these two bacterial orders are closer relatives to each other than to  
410 Selenomonadales. Of public health relevance, predicted prophages infecting these bacterial orders occasionally harboured putative antibiotic resistance genes. More fundamentally, we showed that prophages from Gram-Negative Firmicutes are closer related to prophages from Gram-Positive Firmicutes than to those of Proteobacteria, based on both the position of the lysis module in the genomes of lambdoid prophages  
415 and sequence relatedness among phage portal proteins. There is also an apparent rarity of prophage types in Negativicutes that are common in Proteobacteria. Therefore, Negativicute phages appear to have co-evolved vertically with their Firmicute hosts and not made the horizontal leap from Proteobacteria despite the shared outer membrane structure of their bacterial hosts (**Figure 6**).

420

## Materials and methods

### Annotation of prophage sequences

307 Negativicute and 43 Halanaerobiales genome sequences were downloaded from NCBI GenBank July 2018 (Clark et al., 2016). A further 200 complete genomes from  
425 each of the *Bacillus* and *Escherichia*, and 136 complete genomes for *Clostridium*, were also obtained from GenBank. The sequences were input to PHASTER (Arndt et al., 2016) via the API to predict candidate prophage sequences with the metagenomic contigs option selected to handle incomplete genome assemblies. The processing of data was performed in Python with the Biopython (Cock et al., 2009) and Snakemake  
430 modules (Koster and Rahmann, 2018) calling the following external tools. Open-reading frames were predicted in these possible prophage sequences with prodigal v2.6 (Hyatt et al., 2010). These protein sequences were then annotated with pairwise alignment against the large NCBI NR protein database with diamond v0.8.22 (Buchfink et al., 2015) and separately via profile HMM searches with HMMER3 v3.1b2 (HMMER,  
435 2017) against the Prokaryotic Viral Orthologous Groups (pVOGS) (Grazziotin et al., 2017). We computed all alignment hits with e-value thresholds 0.1 and then for each protein we produced an initial consensus annotation by taking the top NR and pVOG hits, excluding annotations that were from hypothetical, unknown, or uncharacterised proteins.

440

We used the protein annotations to define the phage genome modules as follows with the corresponding associated protein annotations listed in parentheses: head (head, capsid, Clp protease, prohead protease), neck (head tail), portal (portal), tail (tail, tail

445 fibre, tail tube, tail sheath, tail tape measure, base plate), packaging (terminase),  
450 replication (helicase, primase), lysis (lysis, lysin, holin), lysogeny (integrase, repressor,  
antirepressor). tRNAs were also annotated separately. For tail proteins, a more  
specific annotation was preferred over “tail” in the case of multiple hits. Any prophage  
sequences that contained fewer than two annotated proteins were discarded at this  
stage. Several *Escherichia* and *Bacillus* phages were also discarded after manual  
inspection as it was unclear if they represented individual phages or two adjacent. For  
the two *A. intestini* phages that we identified previously (Rands et al., 2018), we  
manually curated the prophage boundaries.

455 Prophage genome maps were visualized via R scripts using the ggplot2 and Gviz  
packages (Hahne and Ivanek, 2016). We aligned and visually inspected the genome  
maps to identify lambdoid phages and we searched for Mu and P2 phages  
systematically by looking for prophages with at least two annotated proteins relating  
to Mu-like or P2-like phages and then performed further manual inspection of the  
resulting prophage genome maps.

460

## Annotation of bacterial genes within prophages

465 Bacterial genes were tentatively annotated using the NR annotations as 16S, 23S,  
30S, and 50S related proteins. Candidate antibiotic resistance genes were also  
preliminarily annotated based on NR protein hits relating to the following antibiotic  
categories: beta-lactam, aminoglycoside, chloramphenicol, glycopeptide, quinolone,  
tetracycline, macrolide, ansamycin, streptogramin, lipopeptide, vanomycin and efflux  
pump. Then all Gram-Negative Firmicute prophage region proteins were scanned  
using diamond with  $\geq 80\%$  sequence identity and query coverage thresholds against

a merged non-redundant database created in February 2018 of CARD protein  
470 homolog models (Jia et al., 2017) and sequences from Resfinder and ResfinderFG  
(Zankari et al., 2012). A single discrepancy was found (see Results and Discussion):  
three Metallo Beta-lactamases (MBLs) were annotated based on high hits ( $\geq 90\%$   
amino acid identity and query coverage) against an MBL fold metallo-hydrolase  
annotated protein in NR (accession: WP\_084644750.1), but this MBL was not present  
475 in (and did not have a close homolog in) the merged database of curated ARG  
sequences.

Similarly, possible bacterial virulence factors, including toxins, were initially tentatively  
annotated based on NR, but Gram-Negative Firmicute phage sequences were also  
480 scanned for virulence factors by aligning the proteins against the VirulenceFinder  
database (Joensen et al., 2014) with diamond v0.8.22 and 80% sequence identify and  
query coverage thresholds. NR virulence factor hits that were not confirmed by the  
VirulenceFinder search were merely annotated as likely bacterial genes, with a few  
exceptions: Virulence associated E-proteins (VapE) showed homology to phage  
485 primases and helicases and the phage replication annotation was preferred in these  
cases; bacterial toxins sometimes show homology to phage holins, thus annotated  
toxins co-annotated as holins were resolved to phage holins. Transposon related  
genes were annotated based on transposases and recombinases in NR.

## 490 Clustering of prophage genome sequences

The 3,462 full-length filtered prophage genome sequences and the annotated portal  
protein sequences were clustered with CD-HIT and PSI-CD-HIT v4.7 (Fu et al., 2012)

at 80% and 40% sequence identify cut-offs. The subsequent clusters were visualized via the Python matplotlib and networkx modules. The sequences within the cluster  
495 containing both Veillonallales and Acidaminococcales phages were aligned together to create a multiple sequence alignment with MAFFT v7.309 (Kato and Standley, 2013) with 1000 iterations and the adjustdirectionaccurately flag. We then built Maximum Likelihood phylogenies with iqtree v1.1.5 (Nguyen et al., 2015) using 1000 UFBoot2 ultrafast bootstraps (Hoang et al., 2018) and the HKY DNA model. We  
500 visualised the phylogenetic trees with Jalview (Waterhouse et al., 2009).

## Identification of extracellular phages in human gut viromes

183 human gut viromes (sequences of viral-like particles; VLPs) were downloaded from BioProject PRJEB7772 (171 samples) (Norman et al., 2015) and PRJNA356544  
505 (12 samples) (Minot et al., 2012). Paired end Illumina derived sequencing reads from both studies were pre-processed to remove low quality and artefactual sequences with trimmomatic v0.38 and parameters -phred33 ILLUMINACLIP:TruSeq3-PE.fa:2:30:10 LEADING:3 TRAILING:3 SLIDINGWINDOW:4:15 MINLEN:36 (Bolger et al., 2014). Next, low complexity sequences were removed with tagDust2 v2.33 (Lassmann, 2015)  
510 with a dust threshold of 16.

Reads were aligned to the reference bacterial genomes with bowtie v2.3.2 (Langmead and Salzberg, 2012), and subsequently BAM files were processed with SAMtools v1.8 (Li et al., 2009) to remove low quality mapping with MAPQ 10 threshold. Next bedtools  
515 v2.25 (Quinlan and Hall, 2010) and matplotlib were used to generate the coverage plots, pooling the results across all samples.

To identify the *V. parvula* extracellular phages, the reads were assembled with MEGAHIT v1.1.3 (Li et al., 2015) with k-min 27. Upon assembly it became clear that the predicted *V. parvula* prophage 1 was truncated and so the prediction was extended to include the full prophage sequence. Sequences were rotated with MARS (Ayad and Pissis, 2017) to ensure that the sequences started and ended at the same point (since the genomes are circular), and global alignment was performed with emboss stretcher (Rice et al., 2000) with gapopen 16 and gapextend 4 penalties. Percent matches between the sequences was then calculated and genome maps visualized.

## Acknowledgements

We thank Konstantin Popadin, Elizaveta Starikova, Francisco Brito, and Jennifer Tan for helpful comments. We are funded by SNSF grant IZLRZ3\_163863. We are grateful to the Baobab HPC cluster at the University of Geneva for computational resources. The authors declare no conflicts of interest.

## Figure legends

**Figure 1:** Genome organization of prophages. **A.** Genome maps of the most complete and best annotated lambdoid prophages predicted from 350 Gram-Negative Firmicute genomes (**Table S1**) and examples predicted from the genomes of prophages from the genera *Clostridium*, *Bacillus* (Gram-Positive Firmicutes) and *Escherichia* (Gram-Negative Proteobacteria). Each line depicts an individual prophage and each rectangle represents a predicted gene with length and prophage genome position to scale. The genes are color-coded according to the functional annotation of different phage

modules as specified in the top right colour key. The left vertical colour scale identifies  
540 the taxonomic attribution of the host bacteria. All these prophages show the typical  
genome organization of lambdoid phages as most evident over the morphogenesis  
gene modules with a typical gene order (see text for details; exception: Enterobacteria  
phage 2851 / Stx2-converting phages of Escherichia, shown at the bottom, that have  
swapped the capsid and portal gene positions). A characteristic difference is found  
545 between lambdoid prophages from Firmicutes (both Gram-positive and Gram-  
negative) and Proteobacteria in the position of the lysis module (highlighted by \*). **B.**  
Gene flanking analysis of prophage genes. For each phage protein that was annotated  
among the 485 predicted prophages from Negativicutes we took the nearest annotated  
neighbour on each side of that protein and tallied up their frequencies.

550

**Figure 2:** Sequence relationships among prophages using all 485 predicted phages  
of Gram-Negative Firmicutes and 2,977 other prophages predicted from other  
Firmicutes and Proteobacteria (**Tables S1, S2**). Each dot represents an entire  
prophage genome (panels **A, B**) or only the prophage portal protein (panels **C, D**)  
555 coloured with respect to the bacterial host. Each grid reference represents a group of  
phages that cluster together at the indicated nucleotide (bp) (panels A, B) or protein  
(aa) (panels C, D) sequence identity threshold. Phages showing no homology to other  
sequences are not shown (i.e. single dots are omitted). When the dots are highly  
dense a solid block of colour shows a larger group of sequence-related prophages  
560 infecting the same bacterial host.

**Figure 3:** A cluster of Negativicute prophages sharing sequence homology  
(corresponding to **Figure 2A** grid reference G4). Shown are the genome maps



(center), annotated genes are labelled, phage modular attribution is coloured, see key  
565 in **Figure 1**, red: the previous described *aci1* gene (Rands et al., 2018) and other likely  
bacterial genes. Displayed according to the Maximum-Likelihood bootstrapped  
phylogeny based on the full-length prophage sequences (left tree). The right vertical  
column indicates the bacterial hosts, coloured by Negativicute order.

570 **Figure 4:** Comparison of the genome maps of two *Veillonella parvula* UTDB1-3  
prophages (panel **A**: prophage 1, Sfi11-like lineage, panel **B**: prophage 2, Sfi21-like  
lineage, see **Figure S2B**) and their related assembled extracellular virus counterparts  
(free phage) from the fecal virome of two inflammatory bowel disease patients. Phage  
genes are coloured according their modular attribution (legend **Figure 1**) and key  
575 genes are annotated. The lower blue continuous line gives the percentage matches  
based on global alignment of the phage genome sequences.

**Figure 5:** Distribution of prophages insertion sites as bar charts (concentric circles  
indicate the number of observations) projected on the complete bacterial genomes  
580 from Gram-Negative Firmicutes with respect to the origin and terminus of bacterial  
replication. Bacterial genomes were normalized by size and divided up into windows  
representing 5% of each genome size on the perimeter of the outermost circle.

**Figure 6:** Phages of Gram-Negative Firmicutes are grouped with phages of Gram-  
585 Positive Firmicutes. **A.** Depiction of two contrasting hypotheses concerning the  
evolution of Negativicute phages. Our results support the phage-host co-evolution  
hypothesis. **B.** Summary of the different types of prophages putatively detected in  
different bacterial lineages.

## Figures

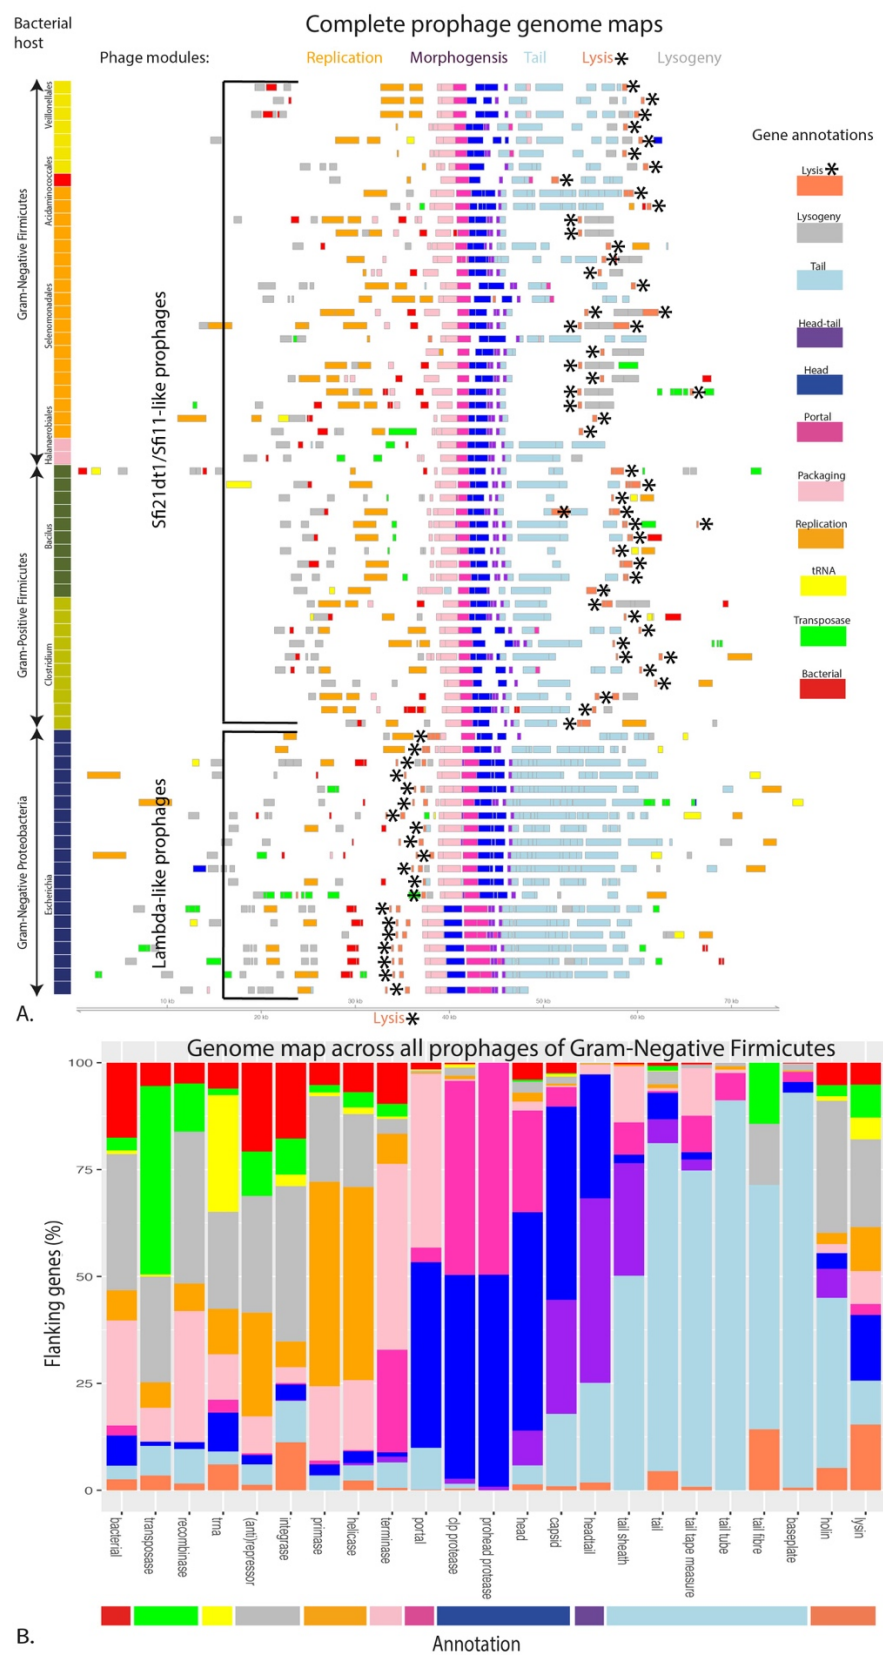

590

**Figure 1**

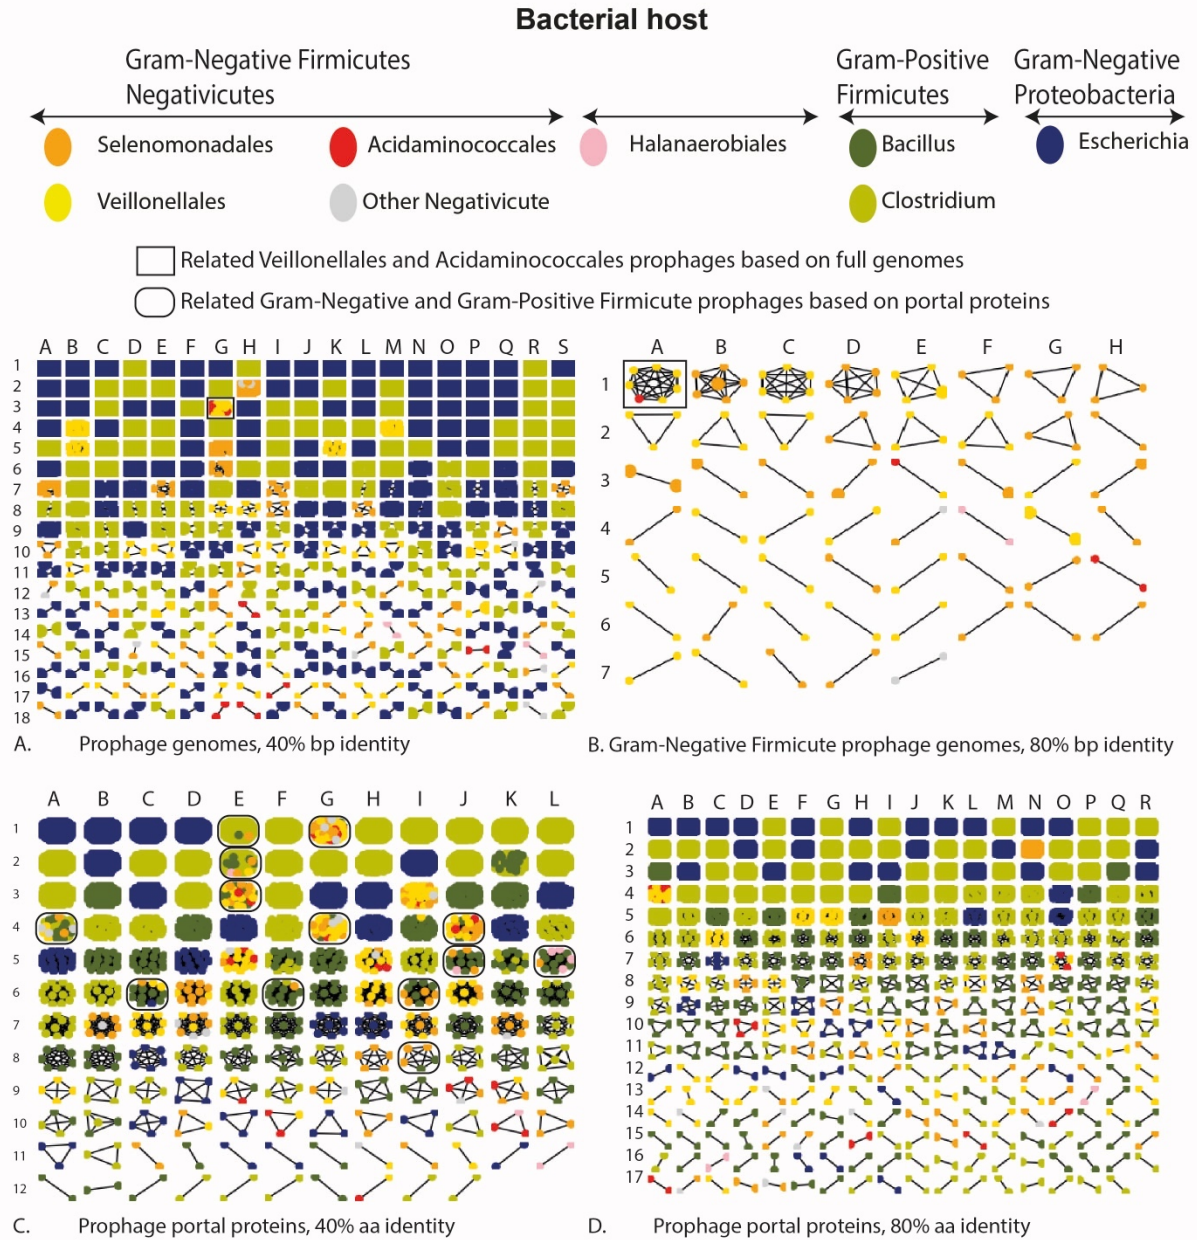

**Figure 2**



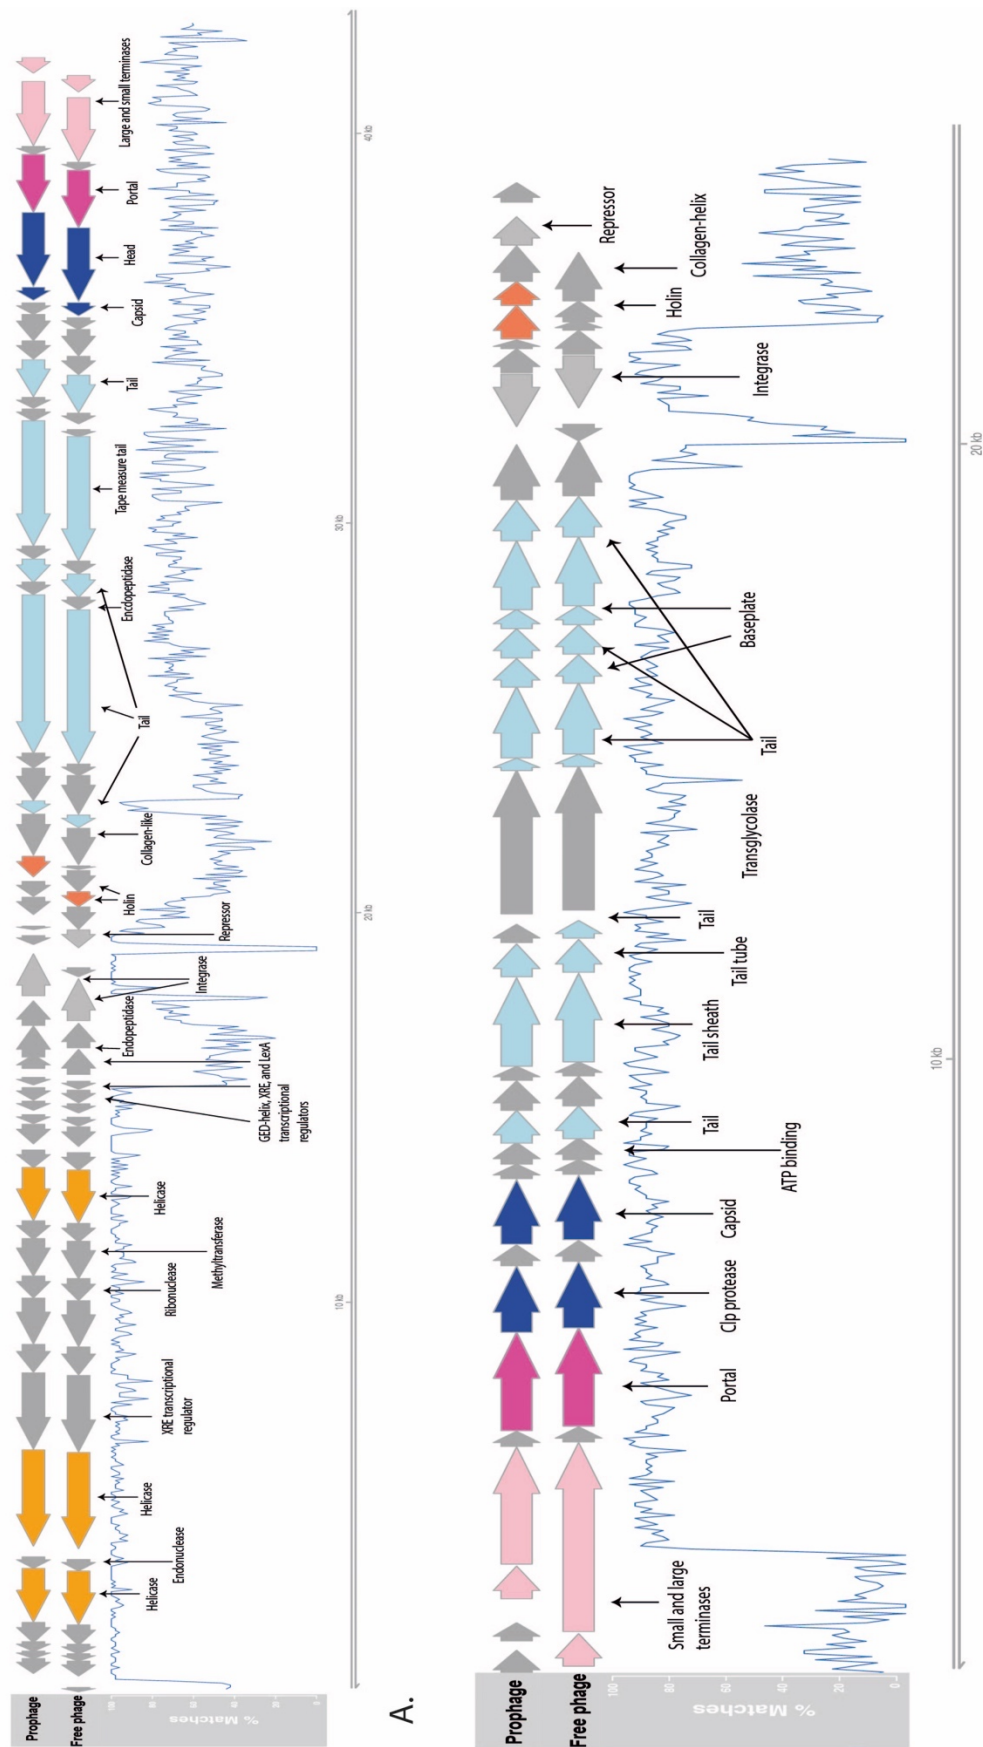

Figure 4

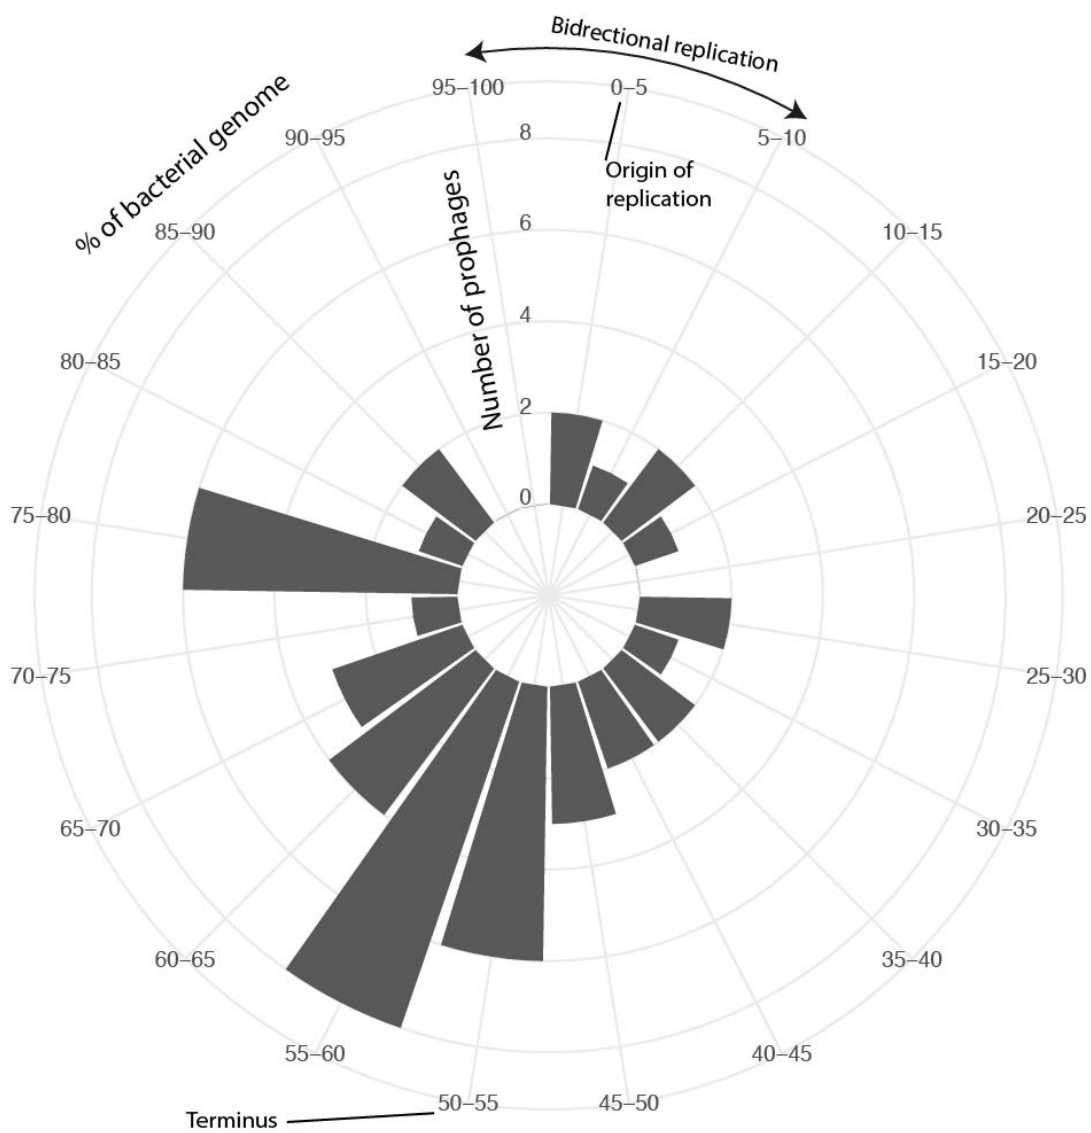

**Figure 5**

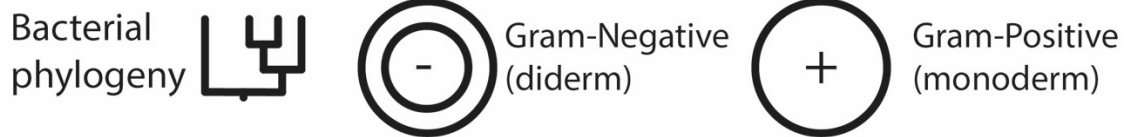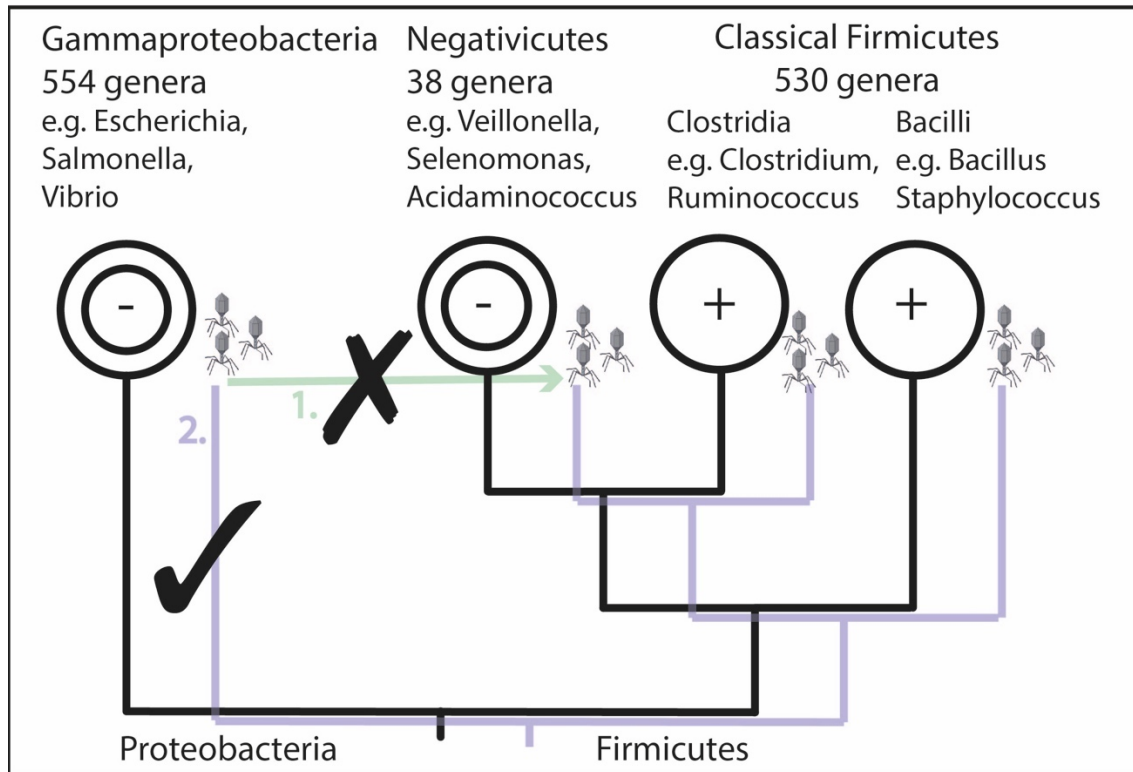

 Phage evolution hypotheses:

~~X~~ 1. Horizontal transfer: Negativicute phages acquired from Proteobacteria

✓ 2. Vertical co-evolution: phage phylogeny mirrors bacterial phylogeny

A.

|                |                              | Prophage lineage |                |     |    |          |
|----------------|------------------------------|------------------|----------------|-----|----|----------|
|                |                              | Lambda           | Sfi21dt1/Sfi11 | Mu  | P2 | Inovirus |
| Bacterial host | Gram-Negative Proteobacteria | C                | R              | C   | C  | C        |
|                | Gram-Negative Firmicute      | N                | C ★            | R ★ | N  | N        |
|                | Gram-Positive Firmicute      | N                | C              | R   | N  | C        |

C = Common >100 R = Rare <10 N = No clear evidence ~0 ★ Novel finding

B.

600

Figure 6

## References

- Antunes, L.C., Poppleton, D., Klingl, A., Criscuolo, A., Dupuy, B., Brochier-Armanet, C. et al. (2016) Phylogenomic analysis supports the ancestral presence of LPS-outer membranes in the Firmicutes. *Elife* **5**.
- 605 Arndt, D., Grant, J.R., Marcu, A., Sajed, T., Pon, A., Liang, Y., and Wishart, D.S. (2016) PHASTER: a better, faster version of the PHAST phage search tool. *Nucleic Acids Res* **44**: W16-21.
- Ayad, L.A., and Pissis, S.P. (2017) MARS: improving multiple circular sequence alignment using refined sequences. *BMC Genomics* **18**: 86.
- 610 Bamford, D.H., Grimes, J.M., and Stuart, D.I. (2005) What does structure tell us about virus evolution? *Curr Opin Struct Biol* **15**: 655-663.
- Bobay, L.M., Rocha, E.P., and Touchon, M. (2013) The adaptation of temperate bacteriophages to their host genomes. *Mol Biol Evol* **30**: 737-751.
- 615 Bobay, L.M., Touchon, M., and Rocha, E.P. (2014) Pervasive domestication of defective prophages by bacteria. *Proc Natl Acad Sci U S A* **111**: 12127-12132.
- Bolger, A.M., Lohse, M., and Usadel, B. (2014) Trimmomatic: a flexible trimmer for Illumina sequence data. *Bioinformatics* **30**: 2114-2120.
- 620 Botstein, D. (1980) A theory of modular evolution for bacteriophages. *Ann N Y Acad Sci* **354**: 484-490.
- Brüssow, H., and Desiere, F. (2001) Comparative phage genomics and the evolution of Siphoviridae: insights from dairy phages. *Mol Microbiol* **39**: 213-222.
- Brüssow, H., Canchaya, C., and Hardt, W.-D. (2004) Phages and the evolution of bacterial pathogens: from genomic rearrangements to lysogenic conversion. *Microbiol Mol Biol Rev* **68**: 560-602, table of contents.
- 625 Buchfink, B., Xie, C., and Huson, D.H. (2015) Fast and sensitive protein alignment using DIAMOND. *Nat Methods* **12**: 59-60.
- Campbell, C., Adeolu, M., and Gupta, R.S. (2015) Genome-based taxonomic framework for the class Negativicutes: division of the class Negativicutes into the orders Selenomonadales emend., Acidaminococcales ord. nov. and Veillonellales ord. nov. *Int J Syst Evol Microbiol* **65**: 3203-3215.
- 630 Canchaya, C., Fournous, G., and Brussow, H. (2004) The impact of prophages on bacterial chromosomes. *Mol Microbiol* **53**: 9-18.
- Canchaya, C., Fournous, G., Chibani-Chennoufi, S., Dillmann, M.L., and Brussow, H. (2003a) Phage as agents of lateral gene transfer. *Curr Opin Microbiol* **6**: 417-424.
- 635 Canchaya, C., Proux, C., Fournous, G., Bruttin, A., and Brüssow, H. (2003b) Prophage genomics. *Microbiol Mol Biol Rev* **67**: 238-276, table of contents.
- Canchaya, C., Desiere, F., McShan, W.M., Ferretti, J.J., Parkhill, J., and Brussow, H. (2002) Genome analysis of an inducible prophage and prophage remnants integrated in the *Streptococcus pyogenes* strain SF370. *Virology* **302**: 245-258.
- 640 Casjens, S.R., and Hendrix, R.W. (2015) Bacteriophage lambda: Early pioneer and still relevant. *Virology* **479-480**: 310-330.
- Cavalier-Smith, T. (2006) Cell evolution and Earth history: stasis and revolution. *Philos Trans R Soc Lond B Biol Sci* **361**: 969-1006.
- 645 Clark, K., Karsch-Mizrachi, I., Lipman, D.J., Ostell, J., and Sayers, E.W. (2016) GenBank. *Nucleic Acids Res* **44**: D67-72.
- Cock, P.J.A., Antao, T., Chang, J.T., Chapman, B.A., Cox, C.J., Dalke, A. et al. (2009) Biopython: freely available Python tools for computational molecular biology and bioinformatics. *Bioinformatics* **25**: 1422-1423.
- 650 Desiere, F., Lucchini, S., and Brüssow, H. (1999) Comparative sequence analysis of the DNA packaging, head, and tail morphogenesis modules in the temperate cos-site *Streptococcus thermophilus* bacteriophage Sfi21. *Virology* **260**: 244-253.
- Desiere, F., Pridmore, R.D., and Brussow, H. (2000) Comparative genomics of the late gene cluster from *Lactobacillus* phages. *Virology* **275**: 294-305.
- 655 Enault, F., Briet, A., Bouteille, L., Roux, S., Sullivan, M.B., and Petit, M.-A. (2017) Phages rarely encode antibiotic resistance genes: a cautionary tale for virome analyses. *ISME J* **11**: 237-247.



- Fu, L., Niu, B., Zhu, Z., Wu, S., and Li, W. (2012) CD-HIT: accelerated for clustering the next-generation sequencing data. *Bioinformatics* **28**: 3150-3152.
- Galán, J.C., Reig, M., Navas, A., Baquero, F., and Blázquez, J. (2000) ACI-1 from *Acidaminococcus fermentans*: characterization of the first beta-lactamase in Anaerobic cocci. *Antimicrob Agents Chemother* **44**: 3144-3149.
- 660 Gao, N.L., Zhang, C., Zhang, Z., Hu, S., Lercher, M.J., Zhao, X.-M. et al. (2017) MVP: a microbe–phage interaction database. *Nucleic Acids Res.*
- Grazziotin, A.L., Koonin, E.V., and Kristensen, D.M. (2017) Prokaryotic Virus Orthologous Groups (pVOGs): a resource for comparative genomics and protein family annotation. *Nucleic*
- 665 *Acids Res* **45**: D491-D498.
- Hahne, F., and Ivanek, R. (2016) Visualizing Genomic Data Using Gviz and Bioconductor. *Methods Mol Biol* **1418**: 335-351.
- HMMER (2017) HMMER.
- Hoang, D.T., Chernomor, O., von Haeseler, A., Minh, B.Q., and Vinh, L.S. (2018) UFBoot2: Improving the Ultrafast Bootstrap Approximation. *Mol Biol Evol* **35**: 518-522.
- 670 Hyatt, D., Chen, G.L., Locascio, P.F., Land, M.L., Larimer, F.W., and Hauser, L.J. (2010) Prodigal: prokaryotic gene recognition and translation initiation site identification. *BMC Bioinformatics* **11**: 119.
- Jia, B., Raphenya, A.R., Alcock, B., Waglechner, N., Guo, P., Tsang, K.K. et al. (2017) CARD 2017: expansion and model-centric curation of the comprehensive antibiotic resistance database. *Nucleic Acids Res* **45**: D566-D573.
- 675 Joensen, K.G., Scheutz, F., Lund, O., Hasman, H., Kaas, R.S., Nielsen, E.M., and Aarestrup, F.M. (2014) Real-time whole-genome sequencing for routine typing, surveillance, and outbreak detection of verotoxigenic *Escherichia coli*. *J Clin Microbiol* **52**: 1501-1510.
- 680 Kang, H.S., McNair, K., Cuevas, D., Bailey, B., Segall, A., and Edwards, R.A. (2017) Prophage genomics reveals patterns in phage genome organization and replication. *bioRxiv*.
- Katoh, K., and Standley, D.M. (2013) MAFFT multiple sequence alignment software version 7: improvements in performance and usability. *Mol Biol Evol* **30**: 772-780.
- 685 Kauffman, K.M., Hussain, F.A., Yang, J., Arevalo, P., Brown, J.M., Chang, W.K. et al. (2018) A major lineage of non-tailed dsDNA viruses as unrecognized killers of marine bacteria. *Nature* **554**: 118-122.
- Kim, M.S., and Bae, J.W. (2016) Spatial disturbances in altered mucosal and luminal gut viromes of diet-induced obese mice. *Environ Microbiol* **18**: 1498-1510.
- Koster, J., and Rahmann, S. (2018) Snakemake—a scalable bioinformatics workflow engine. *Bioinformatics* **34**: 3600.
- 690 Kropinski, A.M. (2000) Sequence of the genome of the temperate, serotype-converting, *Pseudomonas aeruginosa* bacteriophage D3. *J Bacteriol* **182**: 6066-6074.
- Langmead, B., and Salzberg, S.L. (2012) Fast gapped-read alignment with Bowtie 2. *Nat Methods* **9**: 357-359.
- 695 Lassmann, T. (2015) TagDust2: a generic method to extract reads from sequencing data. *BMC Bioinformatics* **16**: 24.
- Li, D., Liu, C.M., Luo, R., Sadakane, K., and Lam, T.W. (2015) MEGAHIT: an ultra-fast single-node solution for large and complex metagenomics assembly via succinct de Bruijn graph. *Bioinformatics* **31**: 1674-1676.
- 700 Li, H., Handsaker, B., Wysoker, A., Fennell, T., Ruan, J., Homer, N. et al. (2009) The Sequence Alignment/Map format and SAMtools. *Bioinformatics* **25**: 2078-2079.
- Louca, S., Mazel, F., Doebeli, M., and Parfrey, L.W. (2019) A census-based estimate of Earth's bacterial and archaeal diversity. *PLoS Biol* **17**: e3000106.
- 705 Lucchini, S., Desiere, F., and Brussow, H. (1998) The structural gene module in *Streptococcus thermophilus* bacteriophage phi Sfi11 shows a hierarchy of relatedness to Siphoviridae from a wide range of bacterial hosts. *Virology* **246**: 63-73.
- Lucchini, S., Desiere, F., and Brüssow, H. (1999) The genetic relationship between virulent and temperate *Streptococcus thermophilus* bacteriophages: whole genome comparison of cos-site phages Sfi19 and Sfi21. *Virology* **260**: 232-243.
- 710 Mahmoudabadi, G., and Phillips, R. (2018) A comprehensive and quantitative exploration of thousands of viral genomes. *Elife* **7**.

- Marchandin, H., Teyssier, C., Campos, J., Jean-Pierre, H., Roger, F., Gay, B. et al. (2010) *Negativicoccus succinicivorans* gen. nov., sp. nov., isolated from human clinical samples, emended description of the family Veillonellaceae and description of Negativicutes classis nov., Selenomonadales ord. nov. and Acidaminococcaceae fam. nov. in the bacterial phylum Firmicutes. *Int J Syst Evol Microbiol* **60**: 1271-1279.
- 715 Minot, S., Grunberg, S., Wu, G.D., Lewis, J.D., and Bushman, F.D. (2012) Hypervariable loci in the human gut virome. *Proc Natl Acad Sci U S A* **109**: 3962-3966.
- 720 Nguyen, L.-T., Schmidt, H.A., von Haeseler, A., and Minh, B.Q. (2015) IQ-TREE: a fast and effective stochastic algorithm for estimating maximum-likelihood phylogenies. *Mol Biol Evol* **32**: 268-274.
- Norman, J.M., Handley, S.A., Baldrige, M.T., Droit, L., Liu, C.Y., Keller, B.C. et al. (2015) Disease-specific alterations in the enteric virome in inflammatory bowel disease. *Cell* **160**: 447-460.
- 725 Oliveira, P.H., Touchon, M., Cury, J., and Rocha, E.P.C. (2017) The chromosomal organization of horizontal gene transfer in bacteria. *Nat Commun* **8**: 841.
- Pfister, P., Wasserfallen, A., Stettler, R., and Leisinger, T. (1998) Molecular analysis of *Methanobacterium* phage psiM2. *Mol Microbiol* **30**: 233-244.
- 730 Pride, D.T., Salzman, J., Haynes, M., Rohwer, F., Davis-Long, C., White, R.A., 3rd et al. (2012) Evidence of a robust resident bacteriophage population revealed through analysis of the human salivary virome. *ISME J* **6**: 915-926.
- Quinlan, A.R., and Hall, I.M. (2010) BEDTools: a flexible suite of utilities for comparing genomic features. *Bioinformatics* **26**: 841-842.
- 735 Rands, C.M., Starikova, E.V., Brussow, H., Kriventseva, E.V., Govorun, V.M., and Zdobnov, E.M. (2018) ACI-1 beta-lactamase is widespread across human gut microbiomes in Negativicutes due to transposons harboured by tailed prophages. *Environ Microbiol*.
- Rice, P., Longden, I., and Bleasby, A. (2000) EMBOSS: the European Molecular Biology Open Software Suite. *Trends Genet* **16**: 276-277.
- 740 Roux, S., Hallam, S.J., Woyke, T., and Sullivan, M.B. (2015) Viral dark matter and virus-host interactions resolved from publicly available microbial genomes. *Elife* **4**.
- Roux, S., Krupovic, M., Daly, R.A., Borges, A.L., Nayfach, S., Schulz, F. et al. (2019) Cryptic inoviruses are pervasive in bacteria and archaea across Earth's biomes. *bioRxiv*.
- Toussaint, A. (2013) Transposable Mu-like phages in Firmicutes: new instances of divergence generating retroelements. *Res Microbiol* **164**: 281-287.
- 745 Vesth, T., Ozen, A., Andersen, S.C., Kaas, R.S., Lukjancenko, O., Bohlin, J. et al. (2013) Veillonella, Firmicutes: Microbes disguised as Gram negatives. *Stand Genomic Sci* **9**: 431-448.
- Warburton, P., Roberts, A.P., Allan, E., Seville, L., Lancaster, H., and Mullany, P. (2009) Characterization of tet(32) genes from the oral metagenome. *Antimicrob Agents Chemother* **53**: 273-276.
- 750 Waterhouse, A.M., Procter, J.B., Martin, D.M.A., Clamp, M., and Barton, G.J. (2009) Jalview Version 2--a multiple sequence alignment editor and analysis workbench. *Bioinformatics* **25**: 1189-1191.
- Yutin, N., and Galperin, M.Y. (2013) A genomic update on clostridial phylogeny: Gram-negative spore formers and other misplaced clostridia. *Environ Microbiol* **15**: 2631-2641.
- 755 Yutin, N., Makarova, K.S., Gussow, A.B., Krupovic, M., Segall, A., Edwards, R.A., and Koonin, E.V. (2018) Discovery of an expansive bacteriophage family that includes the most abundant viruses from the human gut. *Nat Microbiol* **3**: 38-46.
- Zankari, E., Hasman, H., Cosentino, S., Vestergaard, M., Rasmussen, S., Lund, O. et al. (2012) Identification of acquired antimicrobial resistance genes. *J Antimicrob Chemother* **67**: 2640-2644.

760
